# Supplementary material for: Photoinduced hydrosilylation through hydrogen abstraction: an NMR and computational study of the structural effect of silane
Source: Royal Society of Chemistry journal article supplement (doi:10.1039/d1ra08099g), 2022-01-01

Figure SI1.  $^1\text{H}$  NMR spectra of B used for the determination of the number of repeating unit n.

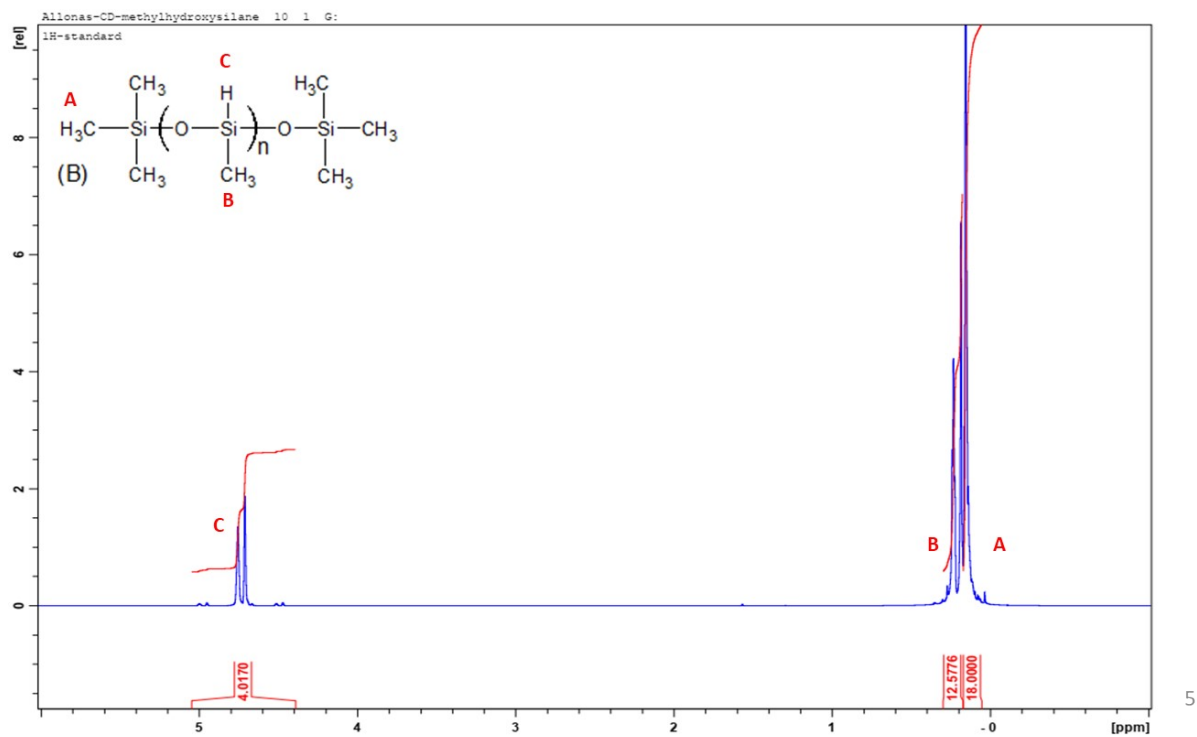

Figure S12.  $^1\text{H}$  NMR spectra of (A+B), (A+C) and (A+E) formulations at reaction time  $t=0$  and  $t=60$  minutes.

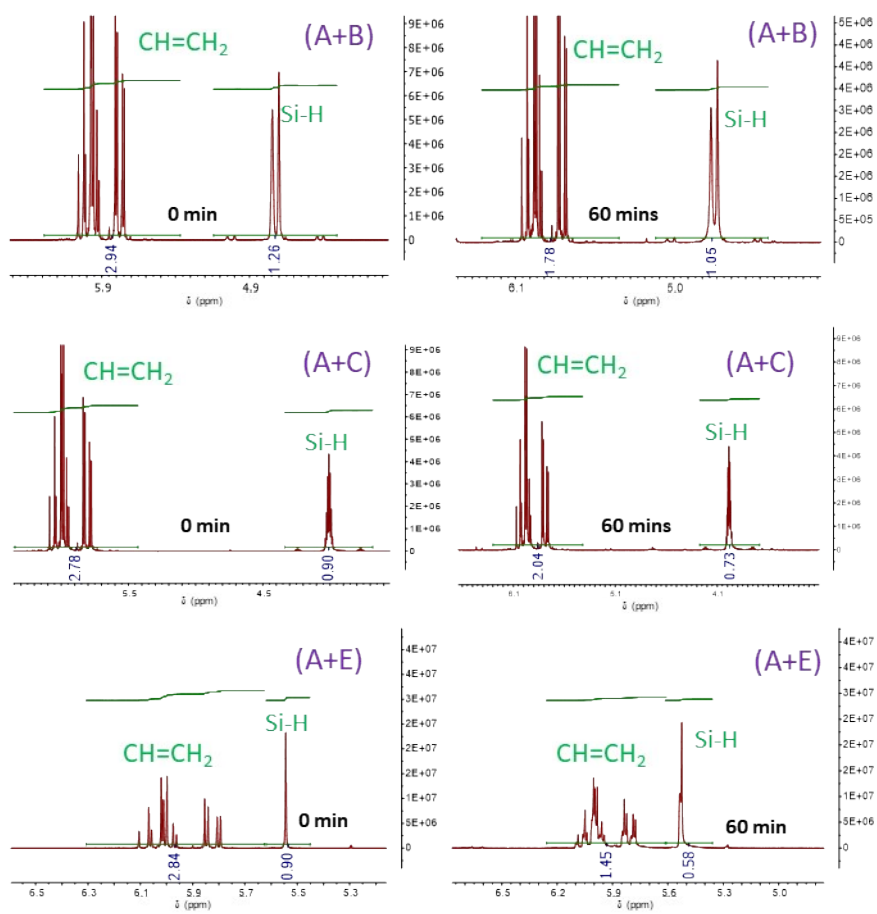

Figure S13. Changes in  $^1\text{H}$  NMR spectra of (A+B), (A+C), (A+D) and (A+E) formulations during irradiation.

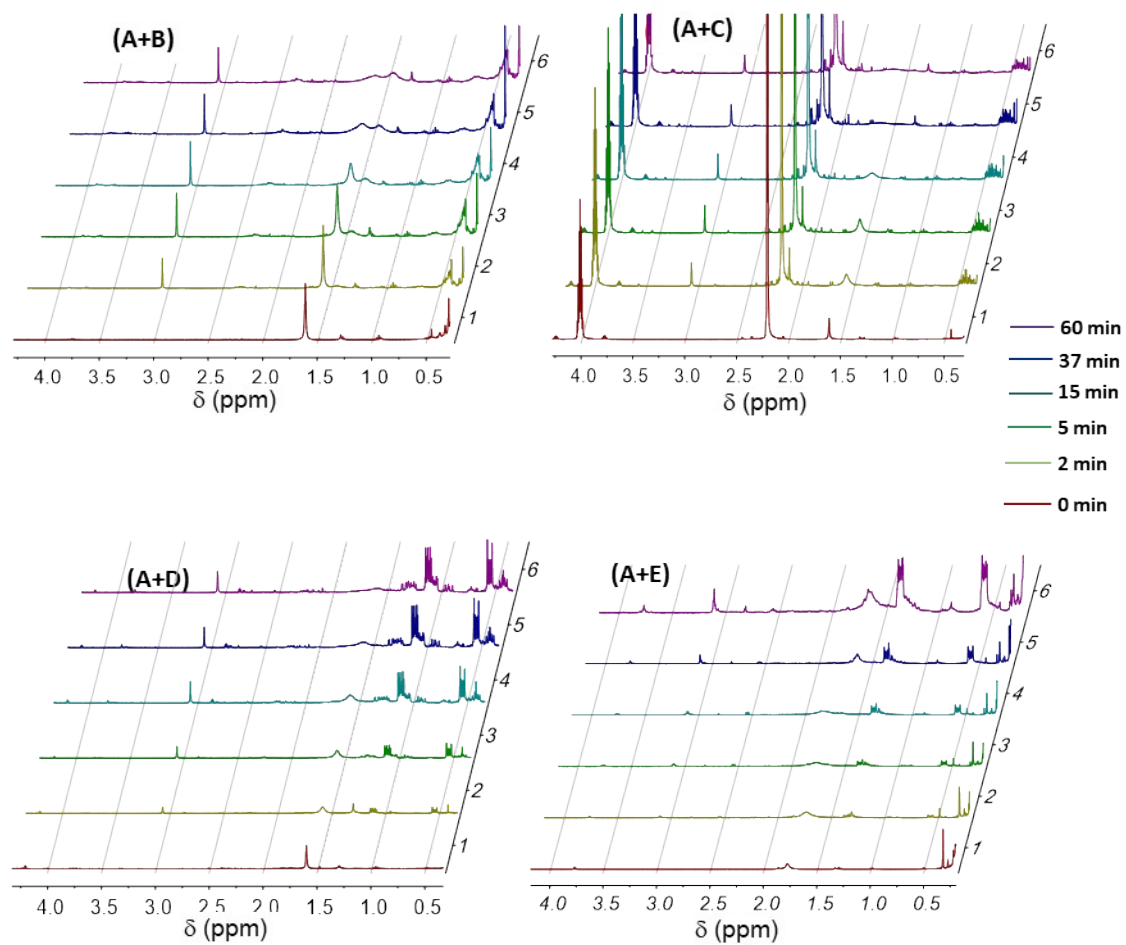

Figure S14. a) <sup>13</sup>C NMR spectrum, b) DEPT spectrum and c) COSY spectrum of (A+D) formulation.

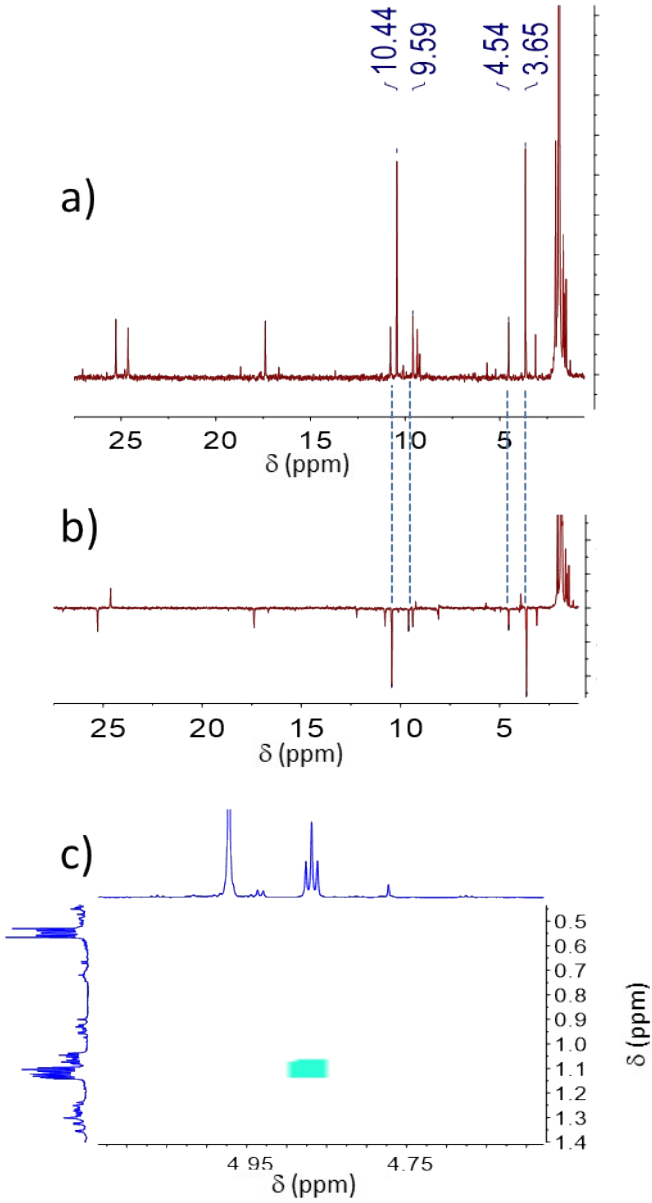

Supplement: d1ra08099g1.pdf [file d1ra08099g1.pdf]
